# Supplementary material for: Local environment inside a novel aromatic micelle investigated by steady-state and femtosecond fluorescence spectroscopy of an encapsulated solvatochromic probe
Source: Royal Society of Chemistry journal article supplement (doi:10.1039/c6cp06174e), 2016-12-08
Supplement: c6cp06174e1.pdf [file c6cp06174e1.pdf]

## Supporting Information

Local environment inside a novel aromatic micelle investigated by steady-state and femtosecond fluorescence spectroscopy of an encapsulated solvatochromic probe

Matthew M. Sartin,<sup>a</sup> Kei Kondo,<sup>b</sup> Michito Yoshizawa,<sup>b</sup> Satoshi Takeuchi,<sup>ac</sup> Tahei Tahara<sup>\*ac</sup>

<sup>a</sup> Molecular Spectroscopy Laboratory, RIKEN, 2-1 Hirosawa, Wako, Saitama 351-0198, Japan

<sup>b</sup> Laboratory for Chemistry and Life Science, Institute of Innovative Research, Tokyo Institute of Technology, 4259 Nagatsuta, Midori-ku, Yokohama 226-8503, Japan

<sup>c</sup> Ultrafast Spectroscopy Research Team, RIKEN Center for Advanced Photonics (RAP), 2-1 Hirosawa, Wako, Saitama 351-0198, Japan

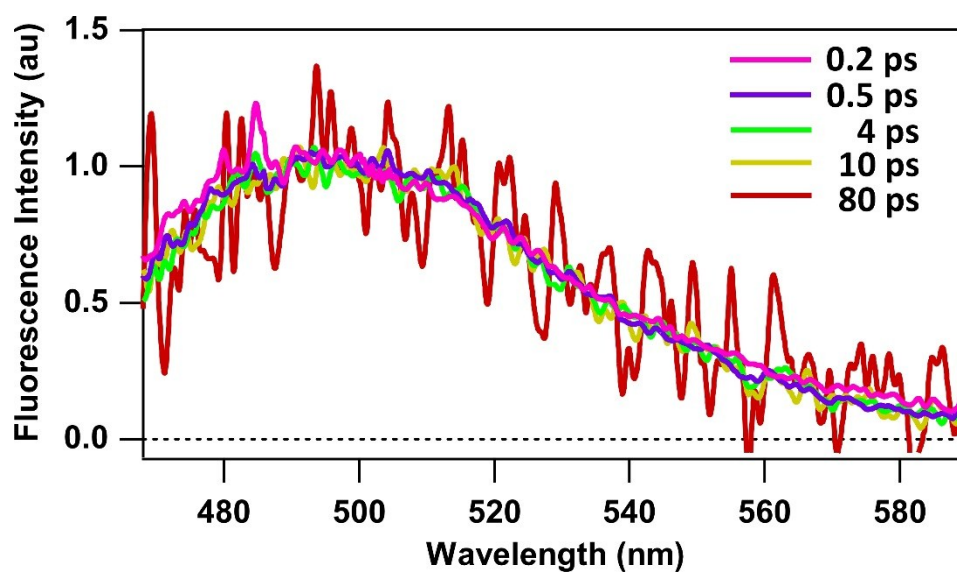

**Figure S1.** Spectra of the rapidly decaying component observed in the femtosecond fluorescence data of ASM=C153/4h. These spectra were obtained by subtracting the time-resolved spectrum at 100 ps from each time-resolved spectrum at several earlier delay times, and then normalizing by intensity.
